# Supplementary material for: Synthesis and structural and magnetic characterisation of cobalt(ii)–sodium phosphonate cage compounds
Source: Royal Society of Chemistry journal article supplement (doi:10.1039/b819976k), 2009-01-01
Supplement: b819976k.pdf [file b819976k.pdf]

## Supplementary Material

### Magnetisation data for compounds

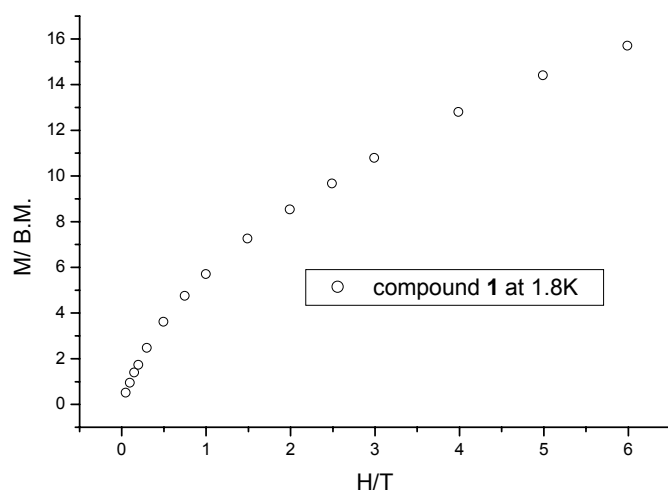

Fig S1. M vs H for compound **1** measured at 1.8 K.

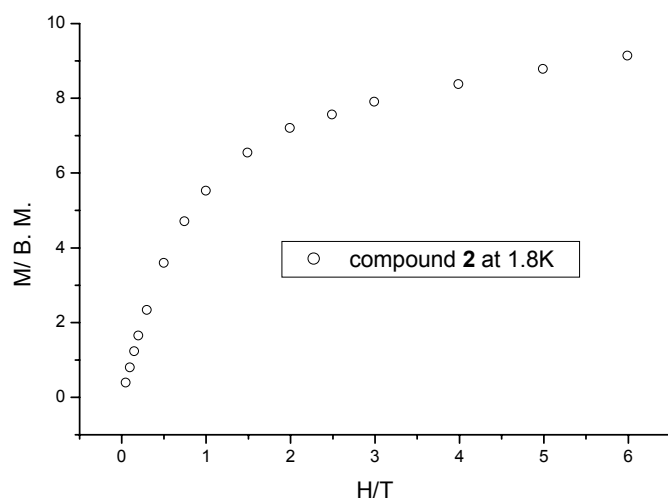

Fig S2. M vs H for compound **2** measured at 1.8 K

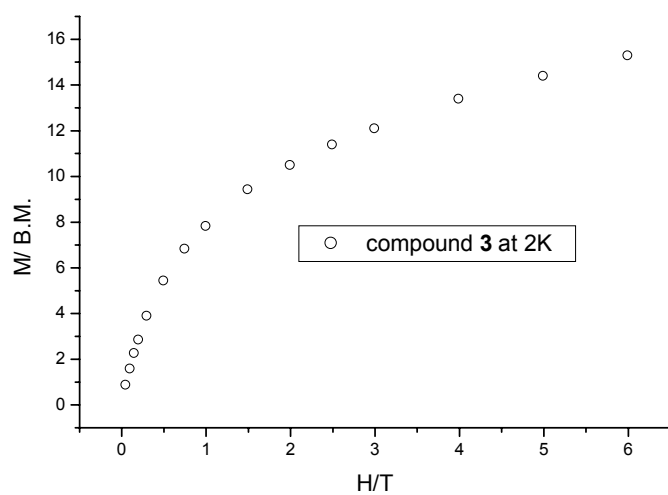

Fig. S3. M vs H for compound 3 at 2 K.

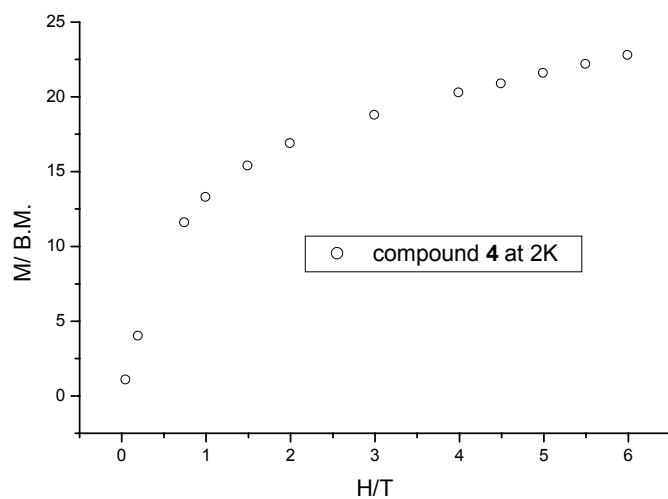

Fig. S4. M vs H for compound 4 at 2 K.

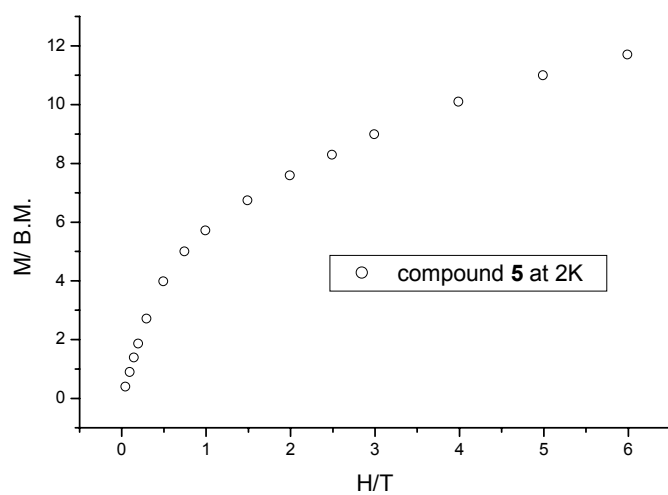

Fig. S5. M vs H for compound **5** at 2 K
